# Supplementary material for: Biosynthesis, characterization and potentiality of lipopeptides produced by Bacillus flexus S1 without inductive carbon sources
Source: Royal Society of Chemistry journal article supplement (doi:10.1039/c6ra17510d), 2016-01-01
Supplement: c6ra17510d1.pdf [file c6ra17510d1.pdf]

**Supplementary material**

**Biosynthesis, characterization and potentiality of lipopeptides produced by  
*Bacillus flexus* S1 without inductive carbon sources**

Chunli Wan <sup>a</sup>, Si Chen <sup>a</sup>, Lei Wen <sup>a</sup>, Xiang Liu <sup>a,\*</sup>, Duu-Jong Lee <sup>b</sup>, Xue Yang <sup>c,d,\*</sup>

<sup>a</sup> Department of Environmental Science and Engineering, Fudan University, Shanghai 200433, China

<sup>b</sup> Department of Chemical Engineering, National Taiwan University of Science and Technology, Taipei  
106, Taiwan

<sup>c</sup> State Key Laboratory of Pollution Control and Resources Reuse, College of Environmental Science  
and Engineering, Tongji University, Shanghai 200092, China.

<sup>d</sup> Postdoctoral Research Station of Civil Engineering, Tongji University, Shanghai 200092, China

\*Corresponding author: Department of Environmental Science and Engineering, Fudan University,  
Shanghai, 200433, China; Tel: +86-21-65642018; Fax: +86-21-65643597; Email:

[liuxiang@fudan.edu.cn](mailto:liuxiang@fudan.edu.cn) (Xiang Liu); State Key Laboratory of Pollution Control and Resources  
Reuse, College of Environmental Science and Engineering, Tongji University, Siping Road, Shanghai  
200092, China. Tel: +86-21-65984275; Fax: +86-21-65984275; E-mail: [xueyang\\_hit@163.com](mailto:xueyang_hit@163.com) (Xue  
Yang).

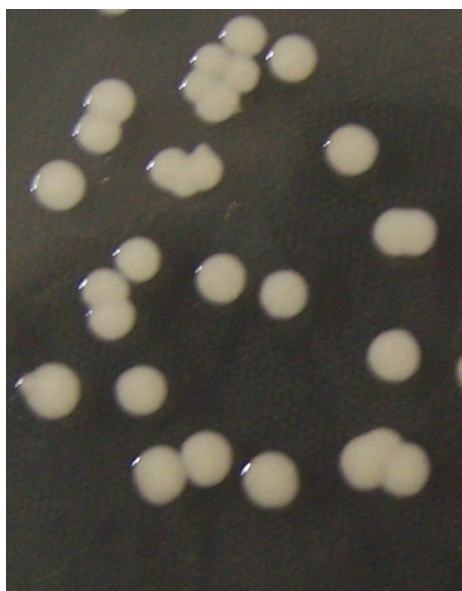

Figure S1 Colonies picture of *Bacillus flexus* S1.

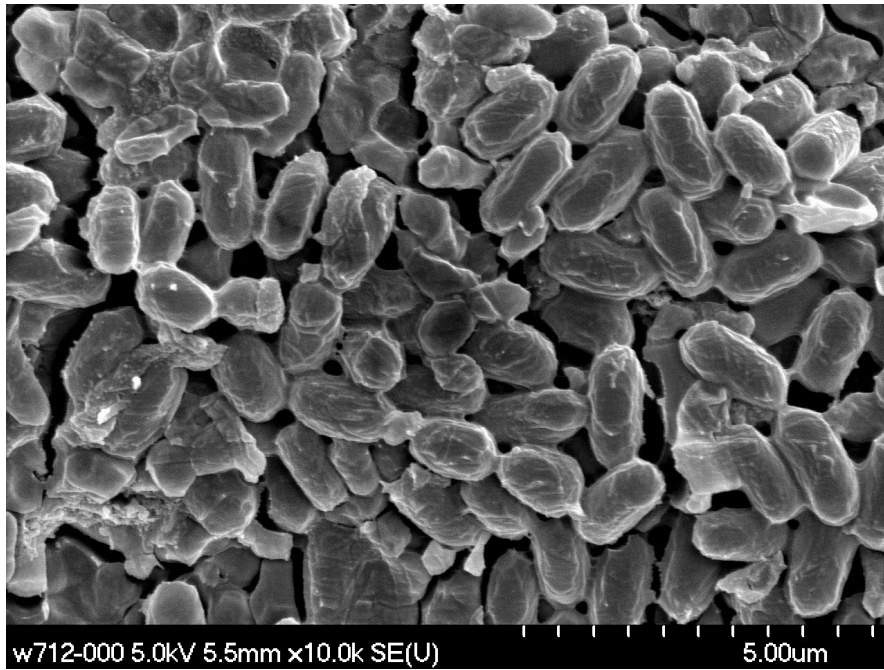

Figure S2 Scanning electron microscope (SEM) micrograph of *Bacillus flexus* S1.

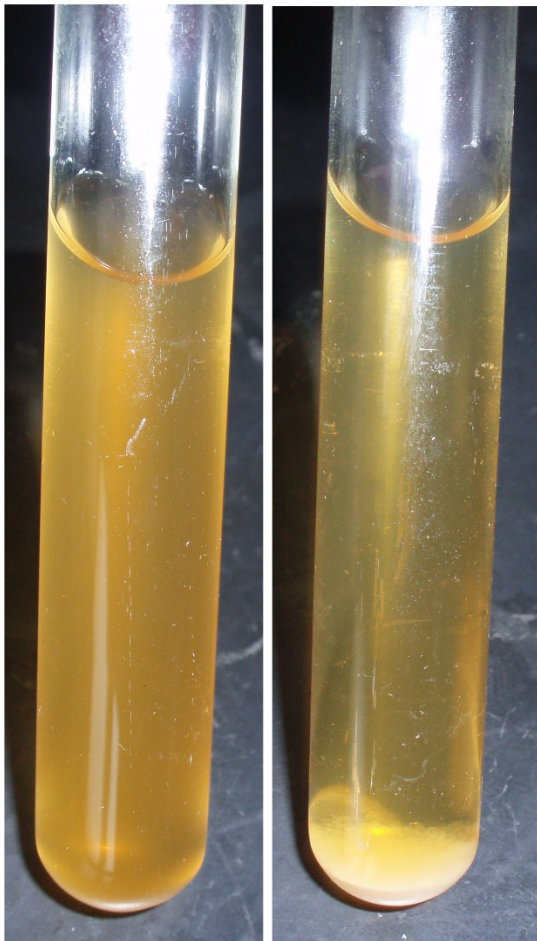

Figure S3 Lipopeptides produced by *Bacillus flexus* S1 fed with LB medium. Left picture is pure LB medium as control test. Right picture is LB medium cultured with *Bacillus flexus* S1, and the white precipitates in the bottom of cuvette is lipopeptides.
